# Supplementary material for: Patterns of Response to Immune Checkpoint Inhibitors in Association with Genomic and Clinical Features in Patients with Head and Neck Squamous Cell Carcinoma (HNSCC)
Source: PubMed Central journal article supplement (PMC7828787; doi:10.3390/cancers13020286), 2021-01-14
Supplement: cancers-13-00286-s001.pdf [file cancers-13-00286-s001.pdf]

Supplementary Materials:

## Patterns of Response to Immune Checkpoint Inhibitors in Association with Genomic and Clinical Features in Patients with Head and Neck Squamous Cell Carcinoma (HNSCC)

Panagiota Economopoulou, Maria Anastasiou, George Papaxoinis, Nikolaos Spathas, Aris Spathis, Nikolaos Oikonomopoulos, Ioannis Kotsantis, Onoufrios Tsavaris, Maria Gkatzamanidou, Niki Gavrielatou, Elena Vagia, Efthymios Kyrodimos, Eleni Gagari, Evangelos Giotakis, Alexander Delides and Amanda Psyrris

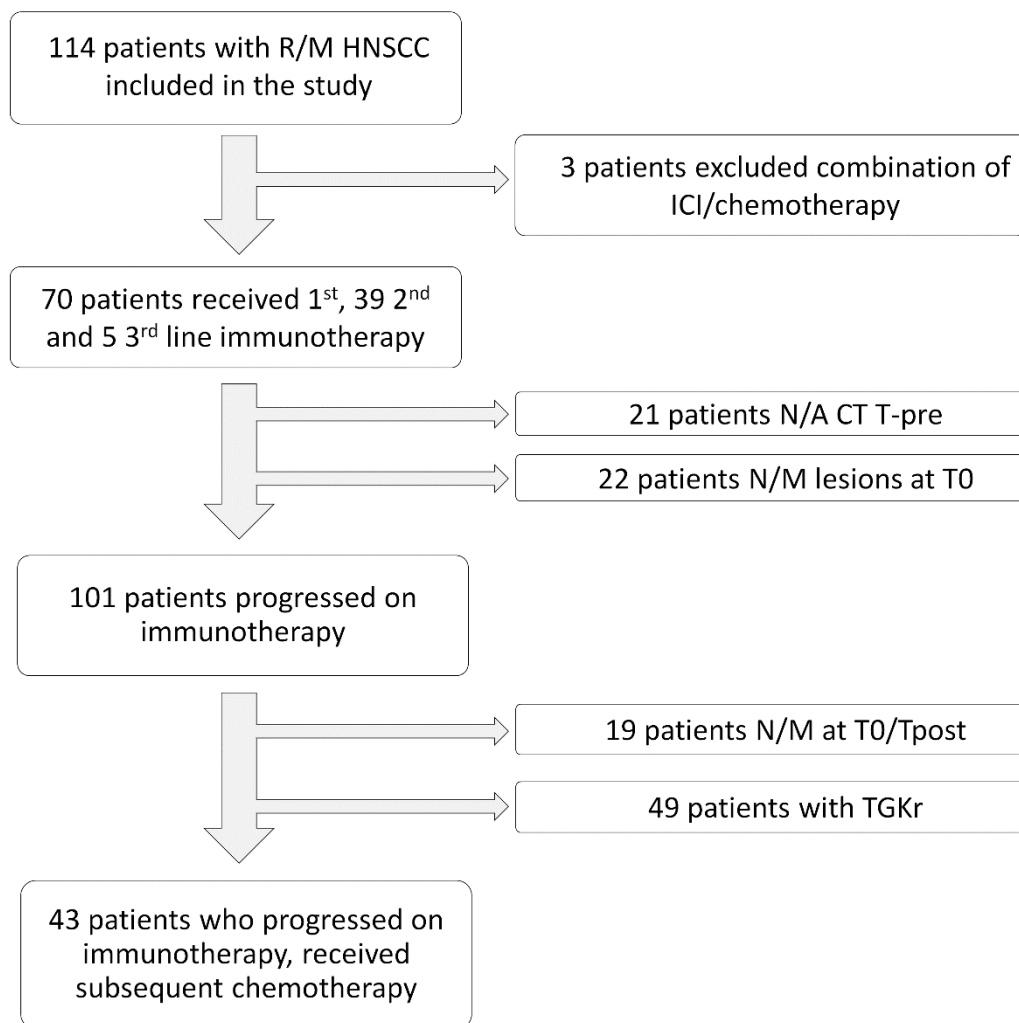

Figure S1. REMARK diagram of the study.

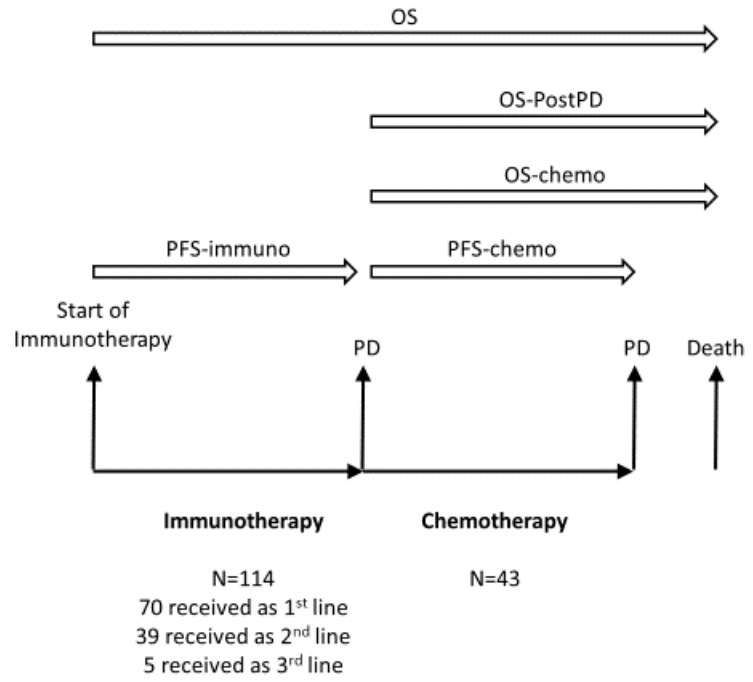

**Figure S2.** Graphical description of survival time definitions.

**Table S1.** Basic characteristics of patients. Statistical significance is noted in bold.

| Characteristic                 |                             | N  | %    |
|--------------------------------|-----------------------------|----|------|
| Age                            | <65 years                   | 32 | 65.3 |
|                                | ≥65 years                   | 17 | 34.7 |
| Sex                            | Male                        | 40 | 81.6 |
|                                | Female                      | 9  | 18.4 |
| History of tobacco use         | No                          | 7  | 14.9 |
|                                | Light/Median                | 5  | 8.6  |
|                                | Heavy                       | 35 | 74.5 |
| History of alcohol consumption | Unknown                     | 2  | 4    |
|                                | No                          | 19 | 41.3 |
|                                | Social                      | 10 | 21.7 |
|                                | Heavy                       | 14 | 30.4 |
| Primary tumor site             | Unknown                     | 4  | 8.2  |
|                                | Oral cavity (including lip) | 22 | 44.9 |
|                                | Oropharynx/Hypopharynx      | 5  | 10.2 |
|                                | Larynx                      | 17 | 34.7 |
| Disease setting                | Nose/paranasal sinuses      | 5  | 10.2 |
|                                | Metastatic                  | 23 | 46.9 |
|                                | Recurrent                   | 26 | 53.1 |

**Table S2.** Association of basic characteristics with type of TGK ratio progression.

| Characteristic                 |                             |                | Type of Progressive Disease |                  | <i>p</i> -Value  |
|--------------------------------|-----------------------------|----------------|-----------------------------|------------------|------------------|
|                                |                             |                | Non-HPD                     | HPD              |                  |
| Age ( <i>N</i> = 49)           |                             | Median (95%CI) | 65.1 (59.8–67.3)            | 53.8 (47.1–61.5) | <b>0.036</b>     |
| Age                            | <65 years                   | <i>N</i> (%)   | 18 (58.1.0%)                | 14 (77.8%)       | 0.219            |
|                                | ≥65 years                   | <i>N</i> (%)   | 13 (41.9%)                  | 4 (22.2%)        |                  |
| Sex                            | Male                        | <i>N</i> (%)   | 26 (83.9%)                  | 14 (77.8%)       | 0.708            |
|                                | Female                      | <i>N</i> (%)   | 5 (16.1%)                   | 4 (22.2%)        |                  |
| History of tobacco use         | No                          | <i>N</i> (%)   | 2 (6.9%)                    | 5 (27.8%)        | 0.493            |
|                                | Light                       | <i>N</i> (%)   | 4 (13.8%)                   | 1 (5.6%)         |                  |
|                                | Heavy                       | <i>N</i> (%)   | 23 (79.3%)                  | 12 (66.7%)       |                  |
| History of alcohol consumption | No/Social                   | <i>N</i> (%)   | 19 (67.9%)                  | 13 (72.2%)       | 1.000            |
|                                | Heavy                       | <i>N</i> (%)   | 8 (32.1%)                   | 5 (27.8%)        |                  |
| Primary tumor site             | Oral cavity (including lip) | <i>N</i> (%)   | 10 (32.3%)                  | 12 (66.7%)       | 0.140            |
|                                | Oropharynx / Hypopharynx    | <i>N</i> (%)   | 4 (12.9%)                   | 1 (5.6%)         |                  |
|                                | Larynx                      | <i>N</i> (%)   | 13 (41.9%)                  | 4 (22.2%)        |                  |
|                                | Nose/paranasal sinuses      | <i>N</i> (%)   | 4 (12.9%)                   | 1 (5.6%)         |                  |
| Primary tumor site             | Oral cavity                 | <i>N</i> (%)   | 10 (32.3%)                  | 12 (66.7%)       | <b>0.036</b>     |
|                                | Other                       | <i>N</i> (%)   | 21 (67.7%)                  | 6 (33.3%)        |                  |
| TNM Stage                      | I–III                       | <i>N</i> (%)   | 9 (31.0%)                   | 8 (44.4%)        | 0.371            |
|                                | IV                          | <i>N</i> (%)   | 20 (69.0%)                  | 10 (55.6%)       |                  |
| Disease setting                | Metastatic                  | <i>N</i> (%)   | 13 (54.2%)                  | 7 (38.9%)        | 0.252            |
|                                | Recurrent                   | <i>N</i> (%)   | 16 (45.8%)                  | 11 (61.1%)       |                  |
| Line of ICI                    | 1st line                    | <i>N</i> (%)   | 21 (67.7%)                  | 6 (33.3%)        | <b>0.036</b>     |
|                                | 2nd–3rd line                | <i>N</i> (%)   | 10 (32.3%)                  | 12 (66.7%)       |                  |
| PD in <3months                 | No                          | <i>N</i> (%)   | 22 (71%)                    | 2 (11.1%)        | <b>&lt;0.001</b> |
|                                | Yes                         | <i>N</i> (%)   | 9 (29%)                     | 16 (88.9%)       |                  |
| OS ( <i>N</i> = 49)            |                             | Median (95%CI) | 11.8 (10–17.7)              | 5.6 (3.8–11.6)   | <b>0.011</b>     |
| PFS-immuno ( <i>N</i> = 49)    |                             | Median (95%CI) | 4.6 (2.6–6.7)               | 2.0 (1.7–2.6)    | <b>&lt;0.001</b> |
| LDH ( <i>N</i> = 49)           |                             | Median (95%CI) | 177 (147–252)               | 203 (181–270)    | 0.276            |
